# Supplementary material for: LEE011 and ruxolitinib: a synergistic drug combination for natural killer/T-cell lymphoma (NKTCL)
Source: PubMed Central journal article supplement (PMC6112754; doi:10.18632/oncotarget.25835), 2018-08-07
Supplement: oncotarget-09-31832-s001.pdf [file oncotarget-09-31832-s001.pdf]

## LEE011 and ruxolitinib: a synergistic drug combination for natural killer/T-cell lymphoma (NKTCL)

### SUPPLEMENTARY MATERIALS

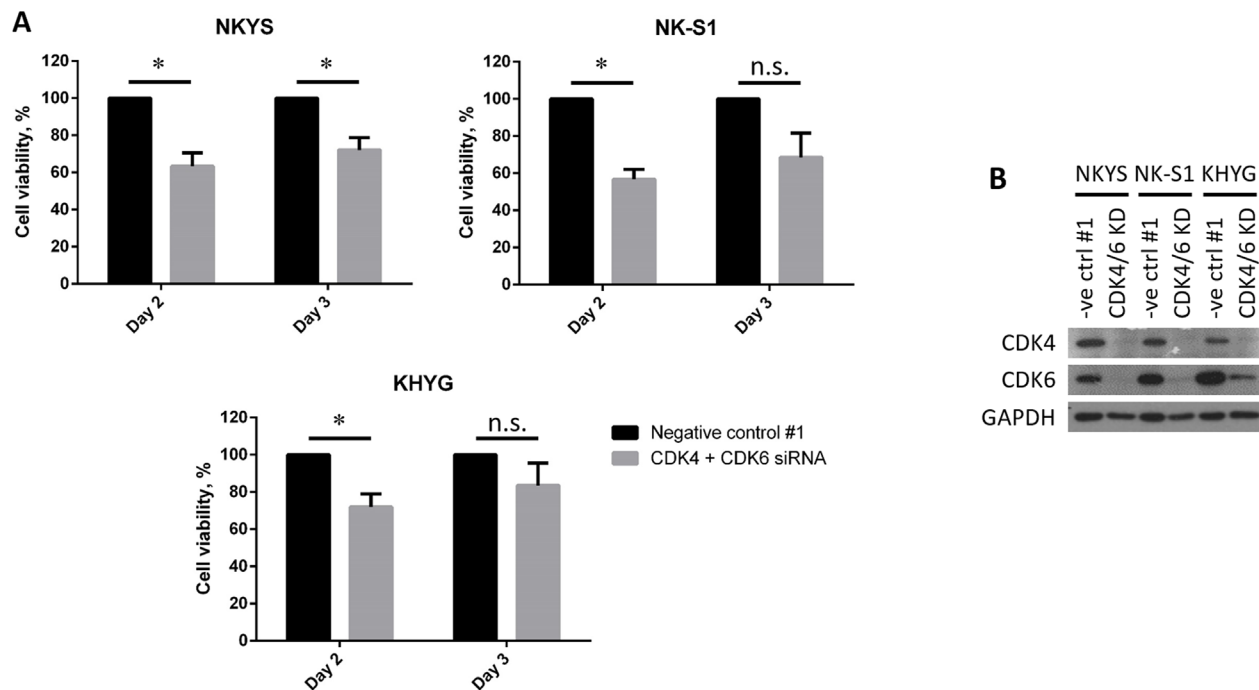

**Supplementary Figure 1: CDK4/6 siRNA KD inhibits growth in NKTCL cell lines.** (A) Cell viability assay showed growth inhibition following dual KD of CDK4 and CDK6 compared to negative control #1 siRNA. In each experiment, duplicate values were averaged and cells that received CDK4/6 siRNA were normalised against those that received the control siRNA. Data is expressed as mean  $\pm$  SEM from three independent experiments ( $n = 3$ , \*  $p < 0.05$ , one-tailed student's  $t$ -test). (B) Western blot analysis of the KD efficiency of CDK4 and CDK6. Cells were harvested on Day 2 after transfection.

**Supplementary Table 1: CI values for different combination concentrations of LEE011 and ruxolitinib for (A) NKYS, (B) NK-S1 and (C) KHYG**

| A              |      |      |      |      |      |      |      |      |      |
|----------------|------|------|------|------|------|------|------|------|------|
| LEE011/uM      | 0.5  |      |      | 1    |      |      | 5    |      |      |
| Ruxolitinib/nM | 25   | 200  | 500  | 25   | 200  | 500  | 25   | 200  | 500  |
| Day 2          | 1.61 | 1.31 | 0.81 | 1.11 | 0.69 | 0.56 | 0.87 | 0.55 | 0.63 |
| Day 3          | 0.73 | 0.90 | 1.12 | 1.03 | 0.82 | 0.92 | 0.79 | 0.61 | 0.76 |

  

| B              |      |      |      |      |      |      |      |      |      |
|----------------|------|------|------|------|------|------|------|------|------|
| LEE011/uM      | 1    |      |      | 5    |      |      | 10   |      |      |
| Ruxolitinib/nM | 25   | 200  | 500  | 25   | 200  | 500  | 25   | 200  | 500  |
| Day 2          | 0.84 | 0.91 | 0.62 | 1.33 | 0.67 | 0.58 | 0.49 | 0.47 | 0.54 |
| Day 3          | 1.35 | 0.74 | 0.98 | 0.99 | 0.87 | 0.99 | 0.99 | 0.88 | 0.94 |

  

| C              |       |      |      |        |      |      |        |      |      |
|----------------|-------|------|------|--------|------|------|--------|------|------|
| LEE011/uM      | 0.2   |      |      | 0.5    |      |      | 1      |      |      |
| Ruxolitinib/nM | 5     | 25   | 200  | 5      | 25   | 200  | 5      | 25   | 200  |
| Day 2          | 4.39  | 0.93 | 0.51 | 0.71   | 0.57 | 0.33 | 0.66   | 0.34 | 0.20 |
| Day 3          | 29.35 | 2.44 | 0.33 | 175.27 | 1.11 | 0.13 | 167.32 | 0.26 | 0.03 |

Fraction inhibition at each condition was determined from the cell viability assay after averaging effects over three independent experiments. CI values of synergistic (CI < 1), additive effect (CI = 1) or antagonistic (CI > 1) relationship between two or more drugs.

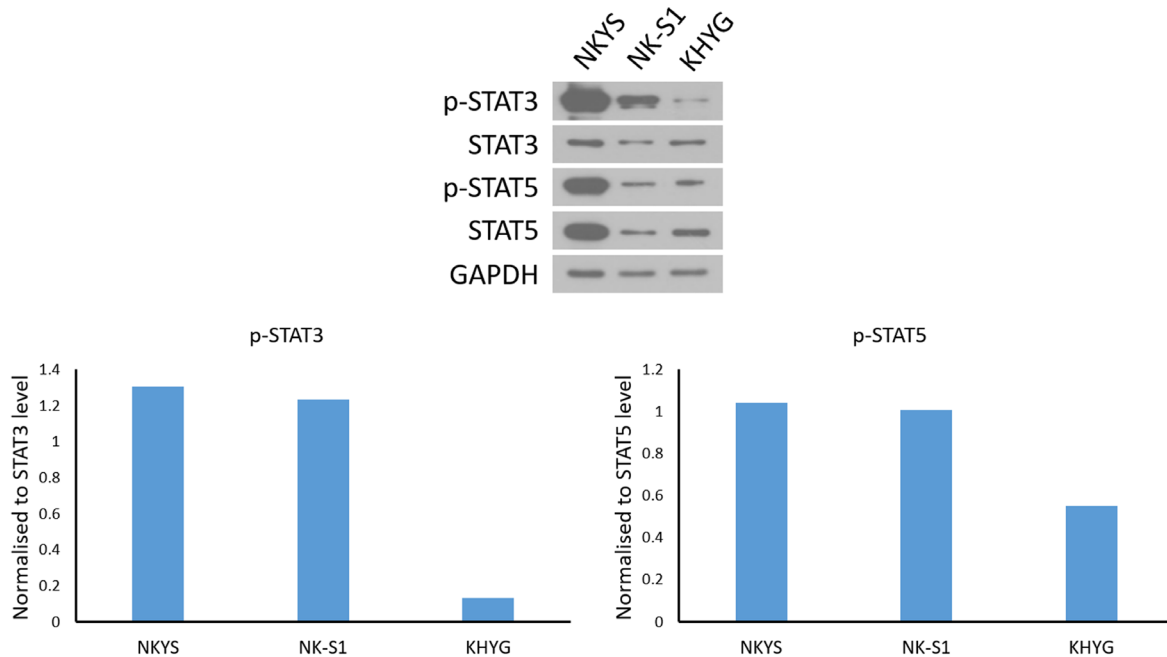

**Supplementary Figure 2: Basal phosphorylation of STAT3/5 proteins in NKYS, NK-S1 and KHYG cell lines.** Cells were harvested two days after subculture. Phosphorylated STAT3/5 levels in each cell line were normalised with their respective total STAT3/5 levels to enable comparison between cell lines.

**Supplementary Table 2: Primer sequences for quantitative RT-PCR analyses**

| <b>Gene</b>  | <b>Direction</b> | <b>Sequence</b>                |
|--------------|------------------|--------------------------------|
| <i>CCND1</i> | F                | GCTCCTGGTGAACAAGCTCAA          |
|              | R                | TTGGAGAGGAAGTGTTCAATGAAA       |
| <i>EZH2</i>  | F                | AGGAGTTTGCTGCTGCTCTC           |
|              | R                | CCGAGAATTTGCTTCAGAGG           |
| <i>GAPDH</i> | F                | GGCTGTGGGCAAGGTCATCCCTGAG      |
|              | R                | GTCGCTGTTGAAGTCAGAGGAGACCACCTG |

F and R stands for forward and reverse primers respectively.
